# Supplementary material
Source: publisher figshare collection journal article supplement (https://acs.figshare.com/ndownloader/files/4537387)
Supplement: Supplementary file 1 [file 4537387]

## Supporting Information

### Characterization of Colloidal Platinum Nanoparticles by MALDI-TOF Mass Spectrometry

*Jason K. Navin,<sup>1</sup> Michael E. Grass,<sup>2</sup> Gabor A. Somorjai,<sup>2</sup> and Anderson L. Marsh<sup>1\*</sup>*

<sup>1</sup>Department of Chemistry, Lebanon Valley College, Annville, PA 17003 USA

<sup>2</sup>Department of Chemistry, University of California, Berkeley, Berkeley, California 94720 USA

\*Corresponding Author: Phone: +1-717-867-6149. E-mail: marsh@lvc.edu

#### Abstract

Contained herein are TEM images and histograms (Figures S-1 to S-4), XRD patterns (Figure S5) and MALDI-TOF mass spectra with corresponding Gaussian curve fits (Figures S-6 to S-10) for the as-synthesized colloidal Pt nanoparticles.

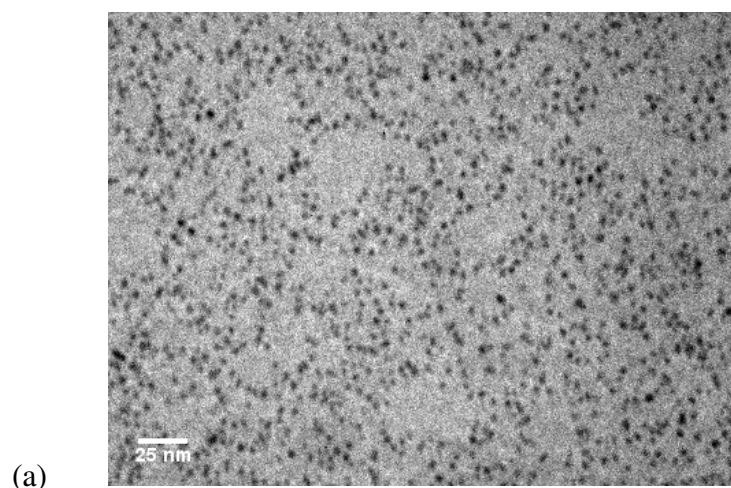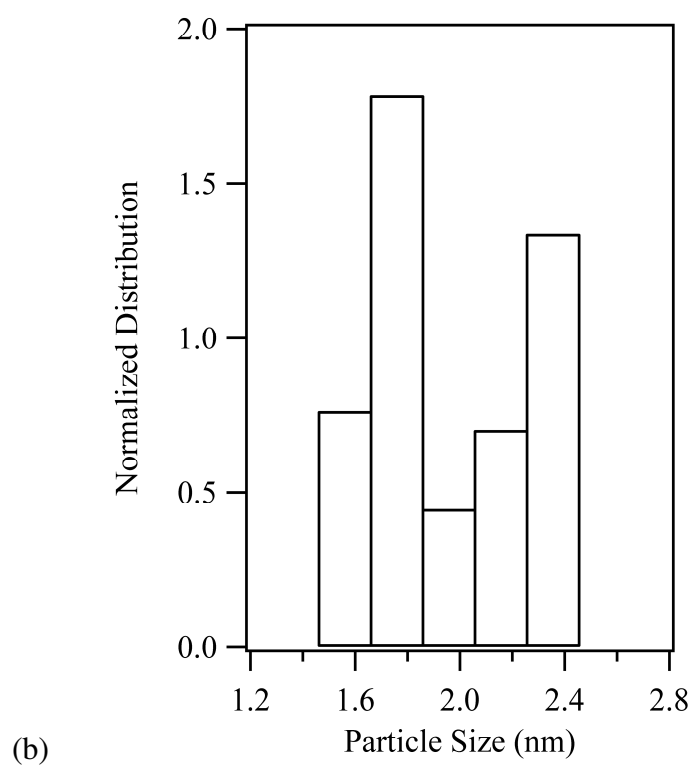

**Figure S-1.** (a) TEM image of PVP-capped platinum nanoparticles synthesized by reduction in the presence of ethylene glycol and (b) histogram of the particle size distribution.

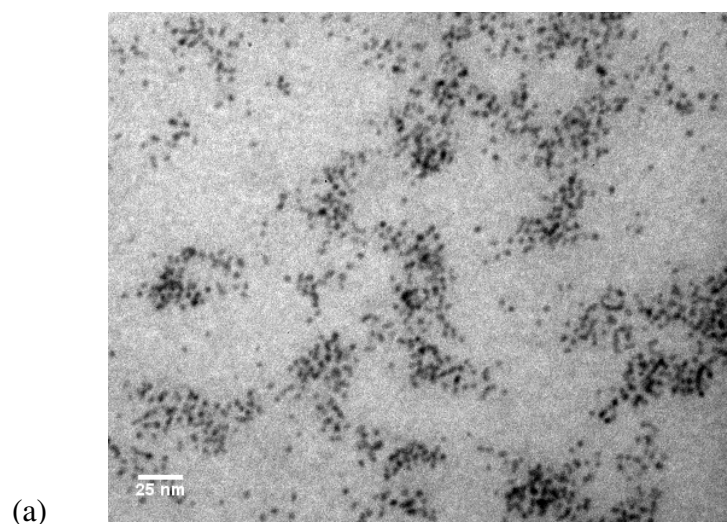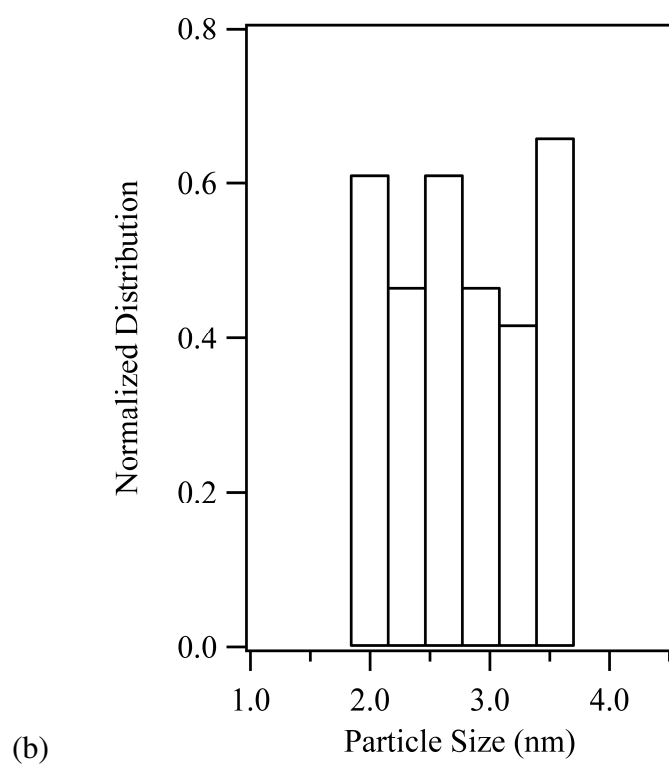

**Figure S-2.** (a) TEM image of PVP-capped platinum nanoparticles synthesized by reduction in the presence of ethanol and (b) histogram of the particle size distribution.

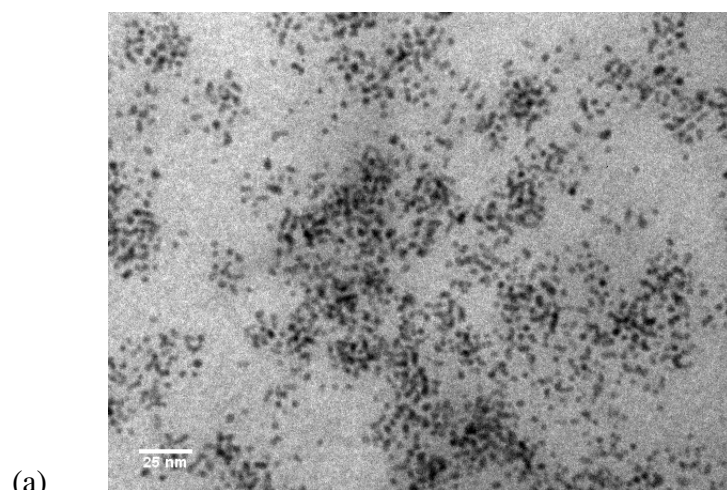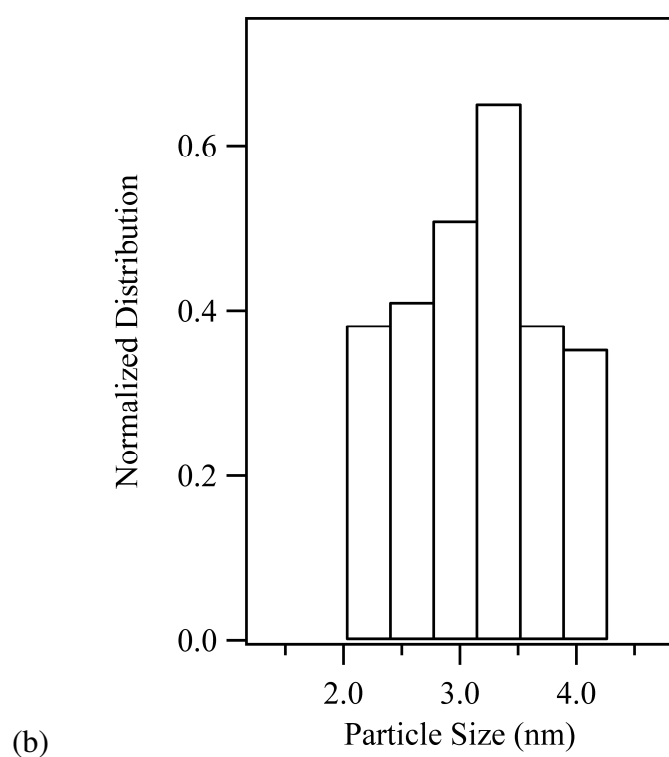

**Figure S-3.** (a) TEM image of PVP-capped platinum nanoparticles synthesized by reduction in the presence of methanol and (b) histogram of the particle size distribution.

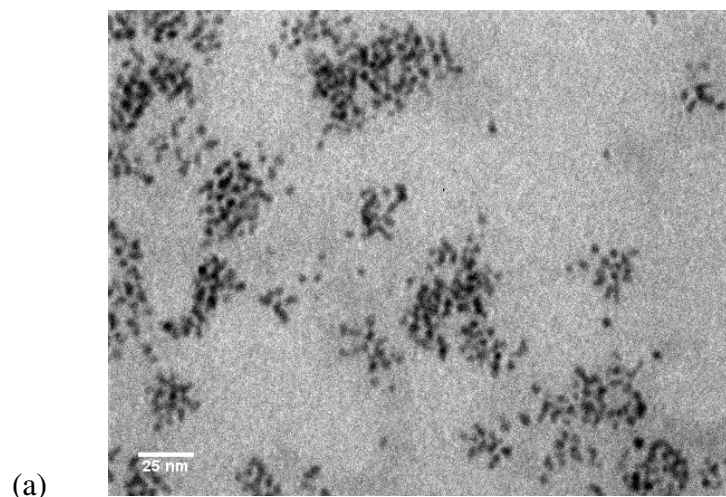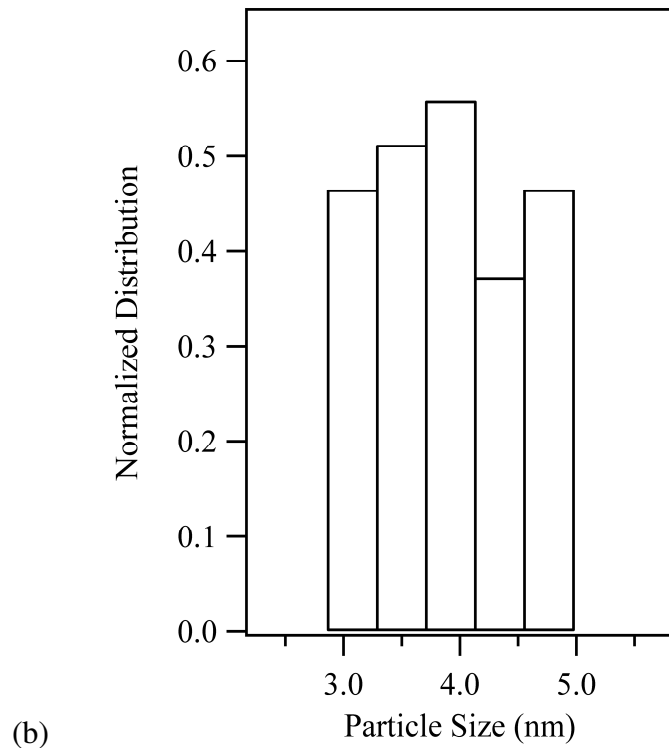

**Figure S-4.** (a) TEM image of PVP-capped platinum nanoparticles synthesized by further reduction in the presence of methanol and 2.94-nm PVP-capped platinum nanoparticles and (b) histogram of the particle size distribution.

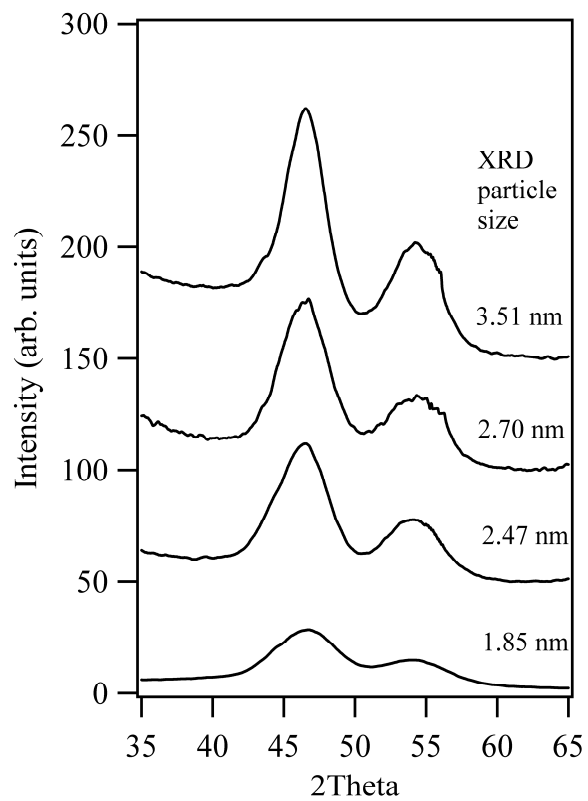

**Figure S-5.** XRD patterns obtained for PVP-capped platinum nanoparticles. Patterns are vertically offset for clarity.

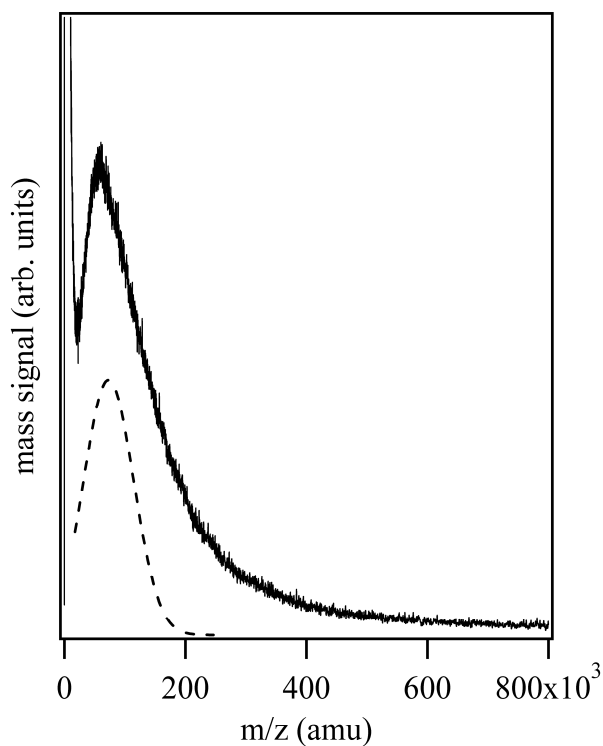

**Figure S-6.** MALDI-TOF mass spectrum of 1.85-nm PVP-capped platinum nanoparticles obtained after 200 shots from a 337-nm N<sub>2</sub> laser on sample spots from a solution of 1:10 v/v platinum nanoparticle colloid to CHCA matrix solution. The dashed line corresponds to the Gaussian curve fit for singly-charged ( $m/z = 73,000$  amu) particles.

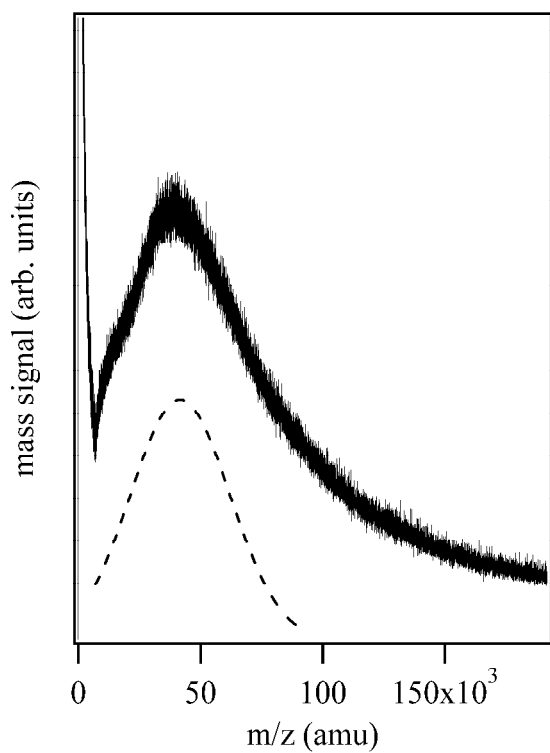

**Figure S-7.** MALDI-TOF mass spectrum of 1.85 nm uncapped platinum nanoparticles obtained after 200 shots from a 337-nm  $N_2$  laser on sample spots from a solution of 1:10 v/v platinum nanoparticle colloid to CHCA matrix solution. The dashed line corresponds to the Gaussian curve fit for singly-charged ( $m/z = 42,000$  amu) particles.



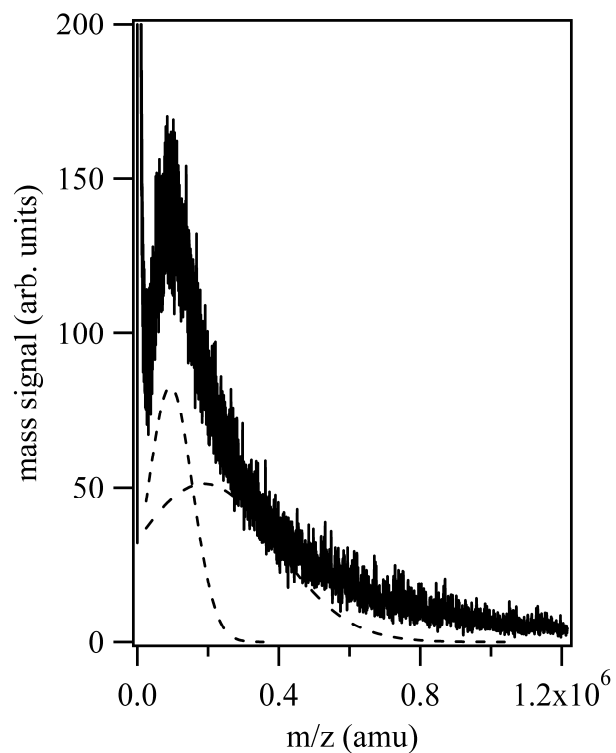

**Figure S-8.** MALDI-TOF mass spectrum of 2.60-nm PVP-capped platinum nanoparticles obtained after 200 shots from a 337-nm N<sub>2</sub> laser on sample spots from a solution of 1:10 v/v platinum nanoparticle colloid to CHCA matrix solution. The dashed lines correspond to Gaussian curve fits for doubly-charged ( $m/z = 93,600$  amu) and singly-charged ( $m/z = 189,000$  amu) particles.

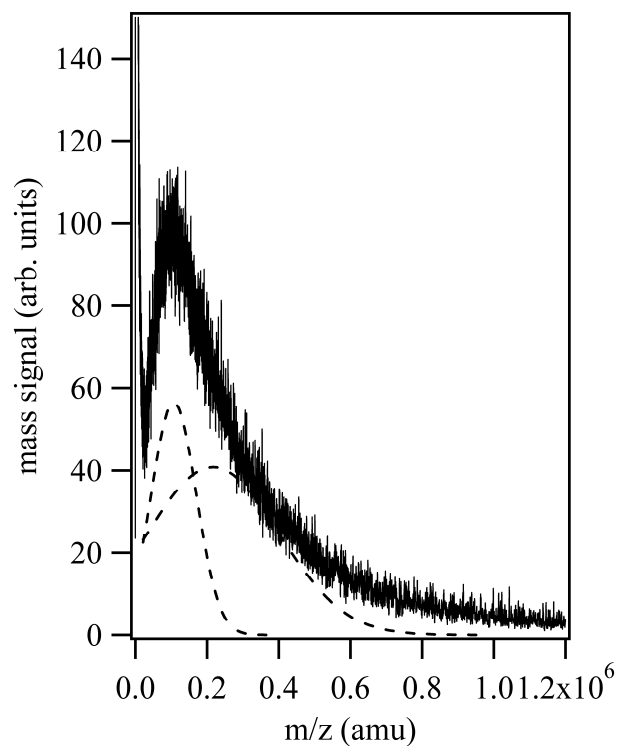

**Figure S-9.** MALDI-TOF mass spectrum of 2.94-nm PVP-capped platinum nanoparticles obtained after 200 shots from a 337-nm N<sub>2</sub> laser on sample spots from a solution of 1:10 v/v platinum nanoparticle colloid to CHCA matrix solution. The dashed lines correspond to Gaussian curve fits for doubly-charged ( $m/z = 107,000$  amu) and singly-charged ( $m/z = 216,000$  amu) particles.

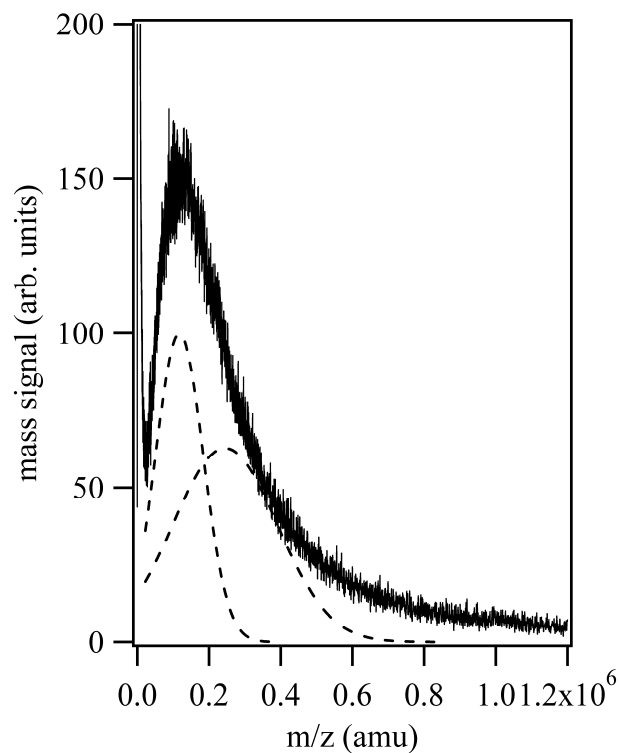

**Figure S-10.** MALDI-TOF mass spectrum of 3.69-nm PVP-capped platinum nanoparticles obtained after 200 shots from a 337-nm N<sub>2</sub> laser on sample spots from a solution of 1:10 v/v platinum nanoparticle colloid to CHCA matrix solution. The dashed lines correspond to Gaussian curve fits for triply-charged ( $m/z = 117,000$  amu) and doubly-charged ( $m/z = 245,000$  amu) particles.
